# Supplementary material for: DBD-Hunter: a knowledge-based method for the prediction of DNA–protein interactions
Source: PubMed Central journal article supplement — Nucleic Acids Res. 2008 May 31;36(12):3978–92. doi: 10.1093/nar/gkn332 (PMC2475642; doi:10.1093/nar/gkn332), 2008-05-31
Supplement: gkn332_1.pdf [file gkn332_1.pdf]

# Supplementary Materials

---

For

DBD-Hunter: A Knowledge-based Method for the  
Prediction of DNA-Protein Interactions

MU GAO AND JEFFREY SKOLNICK

---

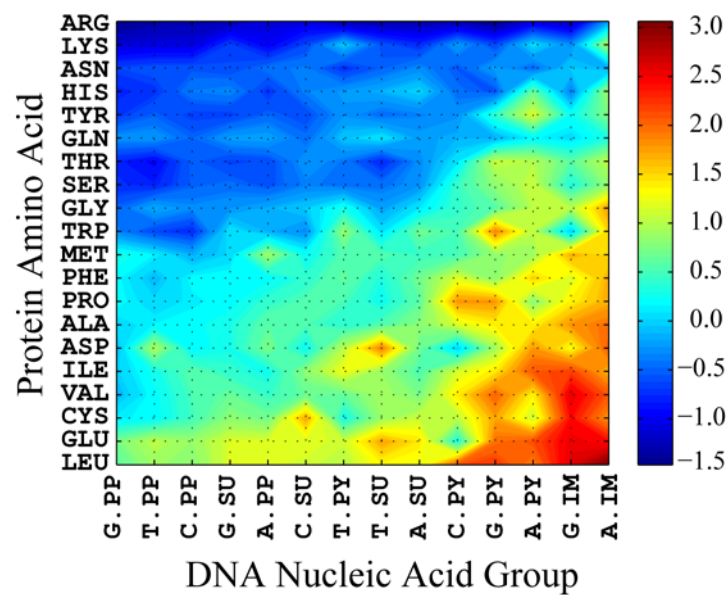

**Figure 1.** Statistical pair potential for describing DNA-protein interactions. The potential was derived from 179 crystal structures of DNA-protein complexes. Contour representation of pair potential parameters for individual DNA functional groups and protein amino acids.

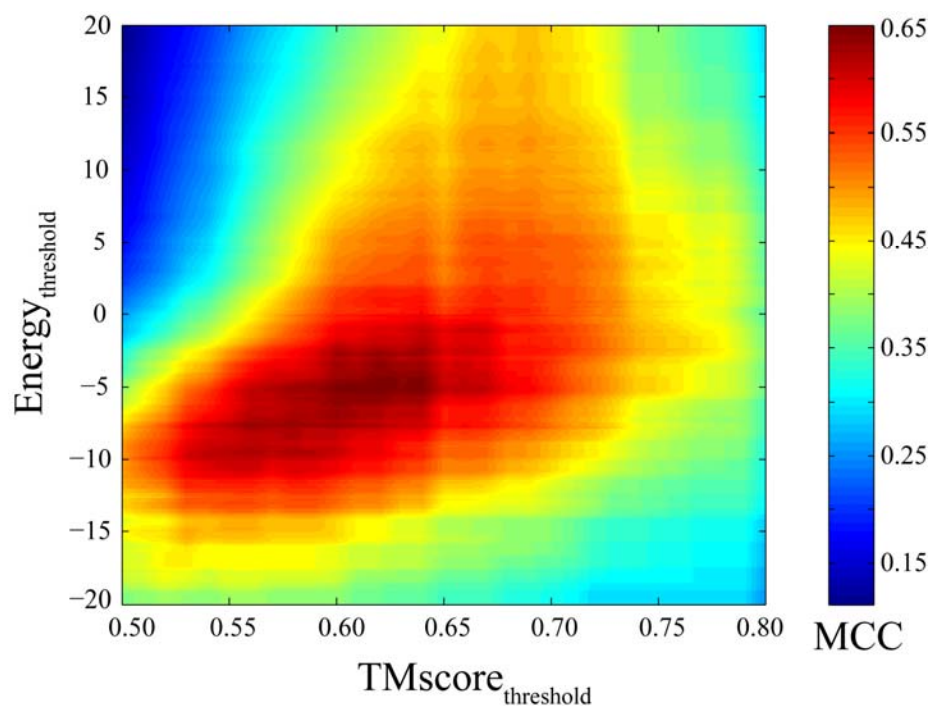

**Figure 2.** Contour representation of the MCC for DNA-binding protein prediction tests on DB179/NB3797. A grid size of 0.01 from 0.50 to 0.80 was employed for the TM-score threshold, and a grid size of 0.1 from -20 to 20 was used for the energy threshold.

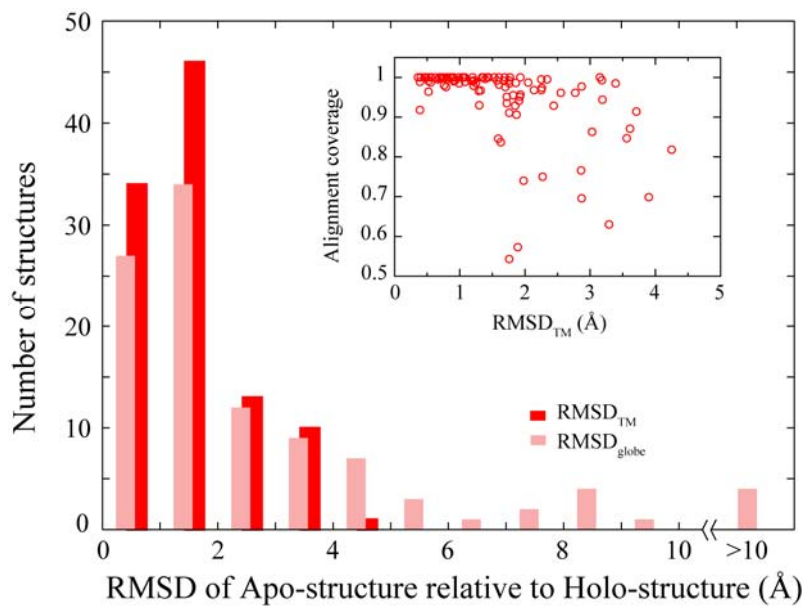

**Figure 3.** RMSDs of apo-structure relative to holo-structure for 104 apo-holo pairs (APO104/HOLO104). Scattered plot for structural alignment coverage *versus* RMSD<sub>TM</sub> are shown in the insert.

**Table 1.** List of the DNA-protein complex structure set DB179. Each entry is provided with the four-digit PDB code, the protein chain identifier, the residue range of the DNA-binding domain, chain identifiers of dsDNA to which the protein is bound, the group name, and the description of the protein. DNA-binding domain comprising the whole protein chain is indicated by “All” in the residue range column. Proteins are classified into three groups: transcription factor (TF), enzyme (EZ), and the others (OT).

| <b>PDB code</b> | <b>Protein chain</b> | <b>Residue Range</b> | <b>DNA Chains</b> | <b>Group</b> | <b>Protein Description</b>  |
|-----------------|----------------------|----------------------|-------------------|--------------|-----------------------------|
| 1a0a            | B                    | All                  | DC                | TF           | PHO4                        |
| 1a36            | A                    | All                  | CB                | EZ           | Topoisomerase I             |
| 1a74            | A                    | All                  | DC                | EZ           | Endonuclease I-PpoI         |
| 1akh            | A                    | All                  | CC                | TF           | MATa1                       |
| 1am9            | B                    | All                  | GF                | TF           | SREBP                       |
| 1b3t            | A                    | All                  | DC                | OT           | EBNA1                       |
| 1bf5            | A                    | 317-568              | CB                | TF           | STAT-1                      |
| 1bl0            | A                    | All                  | CB                | TF           | MarA                        |
| 1bnk            | A                    | All                  | ED                | EZ           | DNA N-glycosylase           |
| 1c9b            | E                    | All                  | DC HG PO          | TF           | Transcription factor IIB    |
| 1c9b            | J                    | All                  | LK                | TF           | TATA-box binding protein    |
| 1cf7            | A                    | All                  | DC                | TF           | E2F-4                       |
| 1cf7            | B                    | All                  | DC                | TF           | DP-2                        |
| 1cgp            | A                    | 138-205              | DD                | TF           | Catabolite gene activator   |
| 1ckt            | A                    | All                  | CB                | OT           | High-mobility-group protein |
| 1cw0            | A                    | All                  | OM                | EZ           | Vsr endonuclease            |
| 1d02            | A                    | All                  | DC                | EZ           | Endonuclease MunI           |
| 1d2i            | A                    | All                  | DC                | EZ           | Endonuclease BglII          |
| 1d3u            | B                    | All                  | DC                | TF           | Transcription factor IIB    |
| 1dc1            | A                    | All                  | CW                | EZ           | Endonuclease BsoBI          |
| 1dct            | B                    | All                  | MF NG             | EZ           | Methyltransferase HaeIII    |
| 1dew            | B                    | All                  | YX                | EZ           | Excision repair enzyme APE1 |
| 1diz            | A                    | 100-282              | FE                | EZ           | DNA glycosylase AlkA        |
| 1ea4            | A                    | All                  | YY                | TF           | CopG                        |
| 1ecr            | A                    | All                  | CB                | OT           | Replication-terminator Tus  |
| 1f4k            | B                    | All                  | ED                | OT           | Replication-terminator RTP  |
| 1fjl            | A                    | All                  | ED                | TF           | Pax                         |
| 1fok            | A                    | All                  | CB                | EZ           | Endonuclease FokI           |
| 1gdt            | A                    | 141-183              | EC FC             | EZ           | Gamma delta resolvase       |
| 1gt0            | D                    | All                  | BA                | OT           | High-mobility-group protein |
| 1gxp            | A                    | All                  | DC                | TF           | PhoB                        |

|      |   |         |       |    |                                 |
|------|---|---------|-------|----|---------------------------------|
| 1h0m | D | 170-234 | HG    | TF | Quorum sensing protein TraR     |
| 1h38 | D | All     | ON PN | EZ | Bacteriophage T7 RNA-polymerase |
| 1h89 | C | All     | ED    | TF | c-Myb                           |
| 1h8a | A | All     | ED    | TF | C/EBP beta                      |
| 1hjb | C | All     | HG    | TF | AML1 RUNT domain                |
| 1hlv | A | All     | CB    | OT | Centromere protein B            |
| 1i3j | A | All     | CB    | EZ | Endonuclease I-TevI             |
| 1iaw | A | All     | DC FE | EZ | Endonuclease NaeI               |
| 1if1 | A | All     | CC    | TF | Interferon regulatory factor    |
| 1ig9 | A | All     | PT    | EZ | DNA polymerase I                |
| 1ign | B | All     | FE    | OT | Telomere protein RAP1           |
| 1iu3 | C | All     | BA    | TF | SeqA                            |
| 1j1v | A | All     | CB    | OT | DnaA                            |
| 1jey | A | 254-534 | DC    | EZ | Ku70                            |
| 1jey | B | 242-545 | DC    | EZ | Ku80                            |
| 1jfi | A | All     | ED    | TF | Negative Cofactor 2 alpha       |
| 1jfi | B | All     | ED    | TF | Negative Cofactor 2 beta        |
| 1jj4 | A | All     | DC    | EZ | Papillomavirus E2               |
| 1jkq | C | All     | BA    | EZ | Recombinase Hin                 |
| 1jt0 | A | 2-72    | FE    | TF | QacR                            |
| 1k3w | A | All     | CB    | EZ | Endonuclease VIII               |
| 1kb4 | A | All     | DC    | TF | Vitamin D receptor              |
| 1kc6 | D | All     | HG    | EZ | Endonuclease HincII             |
| 1kx5 | A | All     | JI    | OT | Histone H3                      |
| 1kx5 | B | All     | JI    | OT | Histone H4                      |
| 1kx5 | C | All     | JI    | OT | Histone H2A                     |
| 1kx5 | D | All     | JI    | OT | Histone H2B                     |
| 1lq1 | D | All     | FE    | TF | Spo0A                           |
| 1m6x | C | All     | GI    | EZ | Recombinase Flp                 |
| 1mdy | B | All     | FE    | TF | MyoD                            |
| 1mj0 | A | All     | GF    | TF | MetJ mutant                     |
| 1mnm | A | All     | FE    | TF | MCM1                            |
| 1mow | D | All     | FE    | EZ | Endonuclease I-DmoI/I-Crel      |
| 1mtl | A | All     | DC    | EZ | DNA glycosylase                 |
| 1mur | A | All     | CB    | EZ | Transposase Tn5                 |
| 1nlw | B | All     | GF    | TF | Max                             |
| 1nlw | D | All     | JH    | TF | Mad                             |
| 1oct | C | All     | BA    | TF | Oct-1 POU                       |
| 1odh | A | All     | DC    | TF | GCM                             |
| 1oe6 | B | All     | FE    | EZ | Uracil-DNA glycosylase SMUG1    |
| 1oh5 | B | 270-566 | FE    | EZ | DNA mismatch repair enzyme MutS |
| 1orn | A | All     | CB    | EZ | Endonuclease III                |
| 1osb | A | All     | BB    | EZ | Relaxase TrwC                   |
| 1ozj | A | All     | DC    | TF | SMAD3 MH1                       |

|      |   |         |       |    |                                       |
|------|---|---------|-------|----|---------------------------------------|
| 1p78 | A | All     | DC    | TF | HU                                    |
| 1p7d | B | All     | FE FF | EZ | Lambda integrase                      |
| 1p7h | N | 393-575 | DC    | TF | NFAT1                                 |
| 1p8k | Z | All     | DA CB | EZ | Endonuclease I-AniI                   |
| 1pp7 | U | All     | FE    | TF | Initiator binding protein IBP39       |
| 1pt3 | A | All     | DC    | EZ | Endonuclease ColE7                    |
| 1pue | E | All     | BA    | TF | ETS                                   |
| 1puf | A | All     | ED    | TF | HoxA9                                 |
| 1qbj | B | All     | ED    | EZ | Deaminase ADAR1                       |
| 1qp9 | D | All     | HG    | TF | HAP1-PC7                              |
| 1qum | A | All     | DB    | EZ | Endonuclease IV                       |
| 1r0a | A | 1-429   | PT    | EZ | HIV-1 reverse transcriptase           |
| 1r7l | B | All     | FE    | TF | KorB                                  |
| 1r7m | A | All     | DC    | EZ | Endonuclease I-SceI                   |
| 1r8d | B | All     | DC    | TF | MerR                                  |
| 1rep | C | All     | BA    | TF | Initiator protein RepE                |
| 1rh6 | B | All     | DC    | EZ | Excisionase Xis                       |
| 1rrq | A | All     | CB    | EZ | DNA glycosylase MutY                  |
| 1rxw | A | All     | CB    | EZ | Flap Endonuclease-1 FEN-1             |
| 1rzz | A | 1-60    | BE    | TF | CcpA                                  |
| 1sax | A | All     | DC    | TF | Methicillin repressor MecI            |
| 1sfu | A | All     | DC    | OT | Yatapoxvirus E3L-like protein         |
| 1skn | P | All     | BA    | TF | Skn-1                                 |
| 1sxp | B | All     | DC    | EZ | Beta-glucosyltransferase              |
| 1t2k | D | All     | FE    | TF | ATF-2                                 |
| 1t8e | A | All     | DC    | EZ | DNA polymerase                        |
| 1tez | A | All     | JI    | EZ | DNA photolyase                        |
| 1tqe | Q | All     | DC    | TF | Myocyte enhancer factor-2             |
| 1trr | G | All     | IC    | TF | Trp repressor                         |
| 1tsr | B | All     | FE    | TF | p53 tumor suppressor                  |
| 1ttu | A | 196-541 | CB    | TF | Nuclear effector CSL                  |
| 1u3e | M | All     | BA CA | EZ | Endonuclease I-HmuI                   |
| 1u78 | A | All     | CB    | EZ | Transposase Tc3A                      |
| 1u8b | A | All     | ED    | EZ | DNA Methyltransferase Ada             |
| 1u8r | J | 1-64    | LK    | TF | Iron-dependent regulator IdeR         |
| 1vas | A | All     | CB    | EZ | Endonuclease V                        |
| 1w0t | A | All     | DC    | OT | Telomeric repeat binding protein TRF1 |
| 1wte | B | All     | YX    | EZ | Endonuclease Eco0109I                 |
| 1wto | A | All     | CB    | OT | Sac7d                                 |
| 1xbr | A | All     | DC    | TF | Brachyury transcription factor        |
| 1xpx | A | All     | CD    | TF | Prospero                              |
| 1y6f | A | All     | DC    | EZ | Alpha-glucosyltransferase             |
| 1yfi | A | All     | DC FE | EZ | Endonuclease MspI                     |
| 1yfi | D | All     | 65 09 | EZ | DNA-adenine Methyltransferase         |

|      |   |         |       |    |                                   |
|------|---|---------|-------|----|-----------------------------------|
| 1ym  | B | All     | CC    | TF | MAT alpha2                        |
| 1ytf | C | All     | FE    | TF | Transcription factor IIA          |
| 1z63 | A | All     | DC    | EZ | SWI2/SNF2 ATPase                  |
| 1z9c | F | All     | LK    | TF | OhrR                              |
| 1zbl | B | All     | DC    | EZ | RNase H                           |
| 1zg5 | B | All     | DC    | TF | NarL                              |
| 1zme | C | All     | BA    | TF | PUT3                              |
| 1zs4 | C | All     | TU    | TF | Lambda cII                        |
| 1zx4 | A | 1-244   | ST    | EZ | ParB                              |
| 2a3v | B | All     | FE    | EZ | Integron integrase                |
| 2a66 | A | All     | CB    | TF | hLRH-1                            |
| 2a6o | B | All     | CC DD | EZ | Transposase TnpA                  |
| 2ago | A | All     | CB    | EZ | DNA polymerase Dpo4               |
| 2aor | B | All     | DC    | EZ | MutH                              |
| 2aq4 | A | All     | TP    | EZ | DNA polymerase Rev1               |
| 2as5 | F | All     | BA DC | TF | FOXP2                             |
| 2bam | B | All     | DC    | EZ | Endonuclease BamHI                |
| 2bdp | A | 469-876 | TP    | EZ | DNA polymerase I                  |
| 2bgw | A | All     | DC    | EZ | XPF endonuclease                  |
| 2bzf | A | All     | CB    | OT | Barrier to autointegration factor |
| 2c7r | A | All     | DC    | EZ | DNA Methyltransferase HhaI        |
| 2c9l | Z | All     | BA    | TF | Epstein-Barr virus ZEBRA protein  |
| 2cax | C | All     | YU    | TF | Repressor omega                   |
| 2dnj | A | All     | CB    | EZ | DNase I                           |
| 2drp | D | All     | FE    | TF | Tramtrack protein                 |
| 2ere | B | All     | DC    | TF | Leu3                              |
| 2evg | A | All     | CB    | TF | Ndt80                             |
| 2ex5 | A | All     | YX    | EZ | Endonuclease I-CeuI               |
| 2ezv | A | All     | GF    | EZ | Endonuclease SfiI                 |
| 2f5p | A | All     | DC    | EZ | DNA glycosylase MutM              |
| 2fio | B | All     | DC    | TF | Protein p4                        |
| 2fl3 | A | All     | DC    | EZ | Endonuclease HinPII               |
| 2fld | B | All     | DC    | EZ | Endonuclease I-MsoI               |
| 2fmq | A | All     | CB    | EZ | DNA polymerase                    |
| 2g1p | A | All     | GF    | EZ | DNA methyltransferase             |
| 2h27 | A | All     | CB    | TF | Group IV sigma factor             |
| 2h7g | X | All     | ZY    | EZ | Topoisomerase                     |
| 2i13 | A | All     | DC    | TF | Designed zinc finger protein      |
| 2ibs | A | All     | CB    | EZ | DNA methyltransferase M.TaqI      |
| 2ihm | A | All     | PT    | EZ | DNA polymerase mu                 |
| 2iie | A | All     | DC EC | OT | Integration host factor           |
| 2is2 | B | All     | DC    | EZ | UvrD helicase                     |
| 2ivk | B | All     | FE JI | EZ | Endonuclease ColE7                |
| 2ntc | A | All     | CW    | OT | SV40 T-antigen                    |



|      |   |         |          |    |                        |
|------|---|---------|----------|----|------------------------|
| 2o8b | A | 457-553 | FE       | EZ | MutSalpha MSH2         |
| 2o8d | B | 362-518 | FE       | EZ | MutSalpha MSH6         |
| 2oaa | A | All     | DC       | EZ | Endonuclease MavI      |
| 2odi | B | All     | FE       | EZ | Endonuclease BcnI      |
| 2ofi | A | All     | BC       | EZ | DNA glycosylase I      |
| 2owo | A | All     | CB DB    | EZ | DNA ligase LigA        |
| 2p0j | B | All     | DC       | EZ | Endonuclease BstYI     |
| 2p6r | A | All     | YX       | EZ | Helicase Hel308        |
| 2pvi | B | All     | DC       | EZ | Endonuclease PvuII     |
| 2pyj | B | All     | YX RQ JK | EZ | Phi29 DNA polymerase   |
| 3cro | L | All     | BA       | TF | Phage 434 Cro          |
| 4crx | B | All     | DC       | EZ | Cre recombinase        |
| 4rve | B | All     | ED       | EZ | Endonuclease EcoRV     |
| 4skn | E | All     | BA       | EZ | uracil-DNA glycosylase |
| 6cro | A | All     | SR       | TF | Lamda Cro protein      |
| 6pax | A | All     | CB       | TF | Pax6                   |
